# Supplementary material for: Integrator-Dependent and Allosteric/Intrinsic Mechanisms Ensure Efficient Termination of snRNA Transcription
Source: PubMed Central journal article supplement (PMC7610016; doi:10.1016/j.celrep.2020.108319), 2020-10-27
Supplement: mmc1.pdf [file mmc1.pdf]

**Cell Reports, Volume 33**

**Supplemental Information**

**Integrator-Dependent and Allosteric/Intrinsic  
Mechanisms Ensure Efficient  
Termination of snRNA Transcription**

**Lee Davidson, Laura Francis, Joshua D. Eaton, and Steven West**

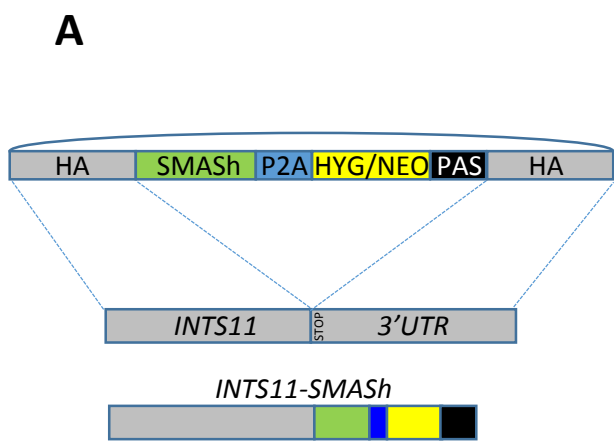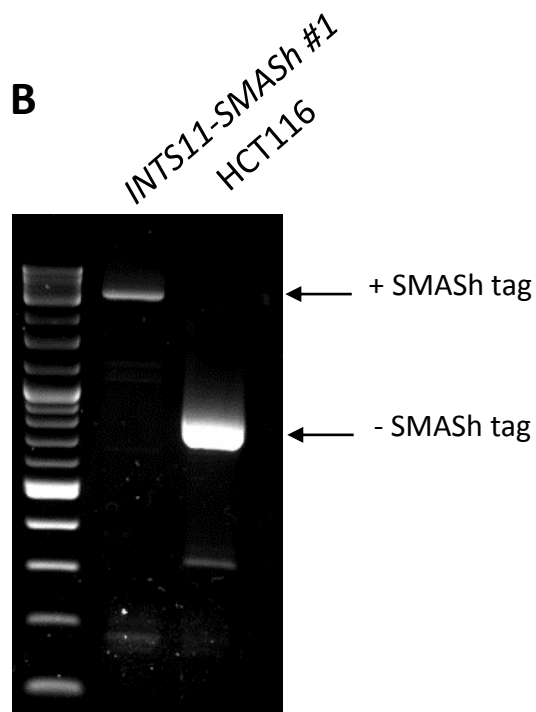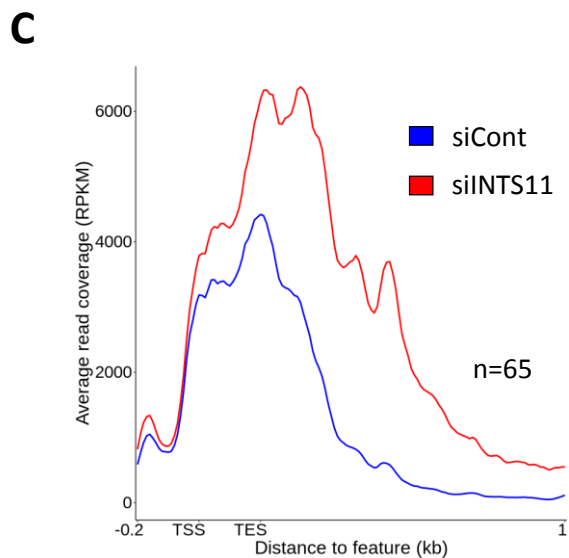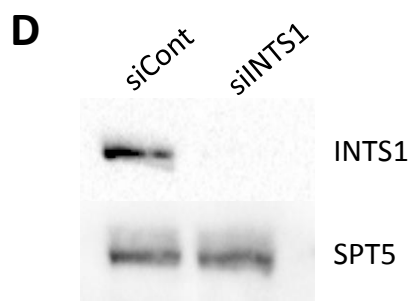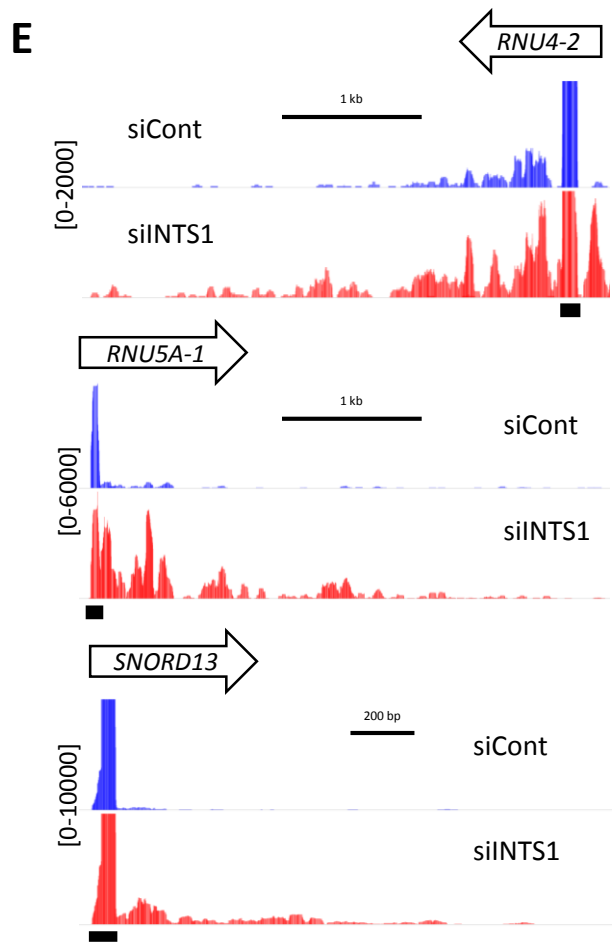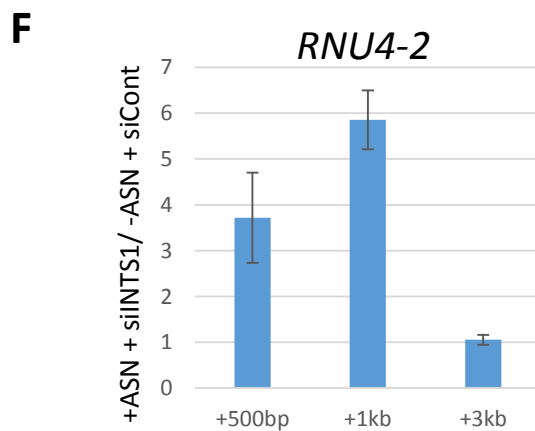

**FIGURE S1**

**FIGURE S1. Integrator depletion delays but does not abolish termination of snRNA transcription, Related to figure 1**

**A.** Schematic of the strategy for inserting the SMASH tag into *INTS11*. The homology-directed repair plasmid is shown with various components coloured and labelled. SMASH is followed by a P2A site, neomycin/hygromycin (Neo/Hyg) resistance markers and an SV40 PAS. While transcribed as a single mRNA, P2A cleavage during translation ensures two separate proteins: INTS11-SMASH and Neo/Hyg.

**B.** PCR verification of the clone taken forward for study. Primers were used outside of the homology arms such that an upshift in product size would be observed as a result of cassette integration. As can be seen, the modified cell line shows this upshift product with a complete loss of the product indicative of no modification, which is present only in unmodified cells.

**C.** Metaplot of Pol II ChIP density over-expressed snRNAs in HeLa cells treated with control or INTS11-specific siRNAs. Signal is RPKM. Data are from (Stadelmayer et al., 2014)

**D.** Western blot of INTS1 levels in *DIS3-AID* cells transfected with control or INTS1-specific siRNAs. SPT5 is also probed for as a loading control.

**E.** Integrated genome viewer (IGV) snapshots of *RNU4-2*, *RNU5A-1* and *SNORD13* in chromatin-associated RNA-seq obtained after transfection with control or INTS1-specific siRNAs. The signal upstream of *RNU4-2* in the RNAi scenario is read-through from *RNU4-1* positioned shortly upstream. Signal is RPKM. *RNU4-2*, 141bp; *RNU5A-1*, 116bp and *SNORD13*, 104bp are shown as a black bar under each trace.

**F.** qRT-PCR analysis of *INTS11-SMASH* cells transfected with control or INTS1-specific siRNAs before treatment or not with ASN. Levels of *RNU4-2* extended read-through was assayed. Position of each amplicon beyond the 3' end processing site is indicated under the graph. Quantitation is relative to non-ASN treated siCont transfected samples after normalising to spliced actin levels. n=3, error bars are SEM.

**A**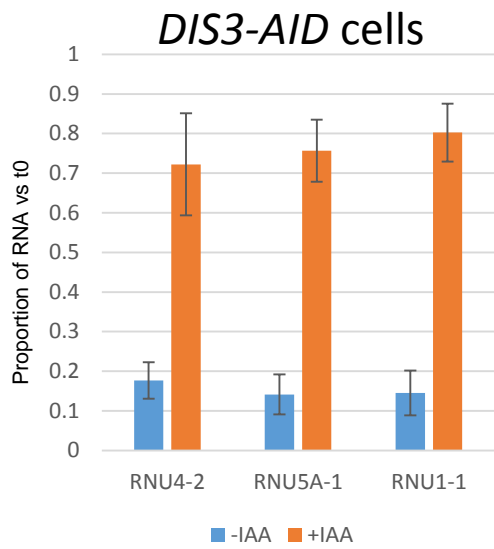**B**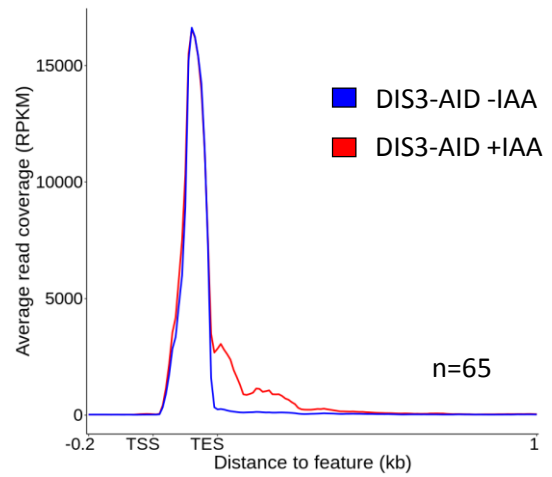**C**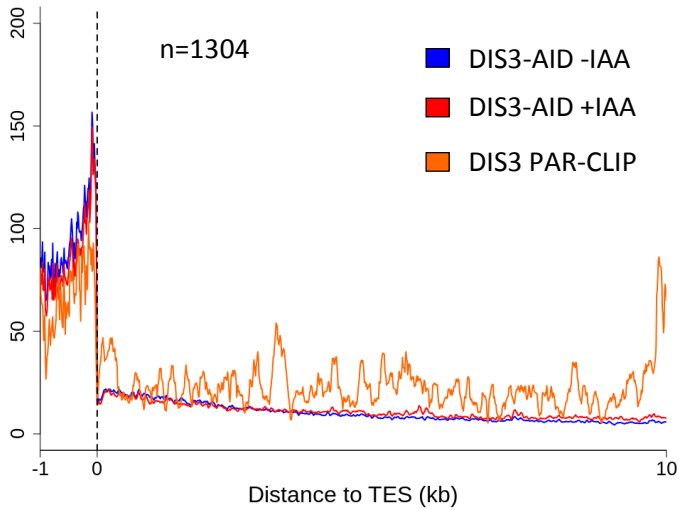**D**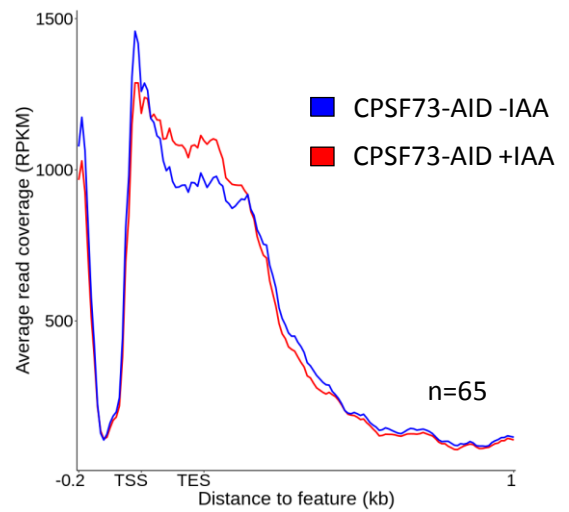**E**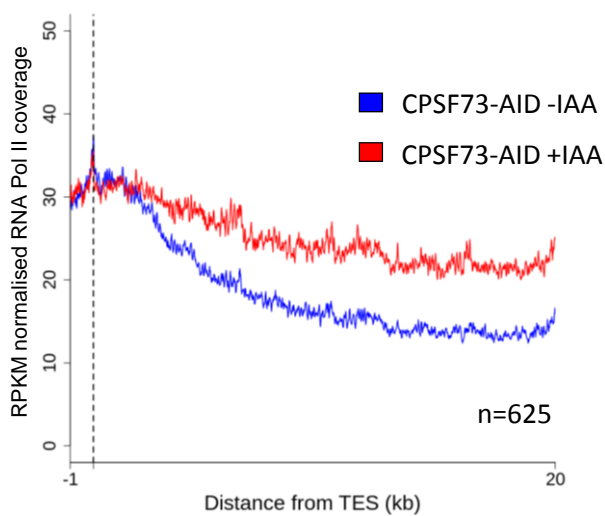**F**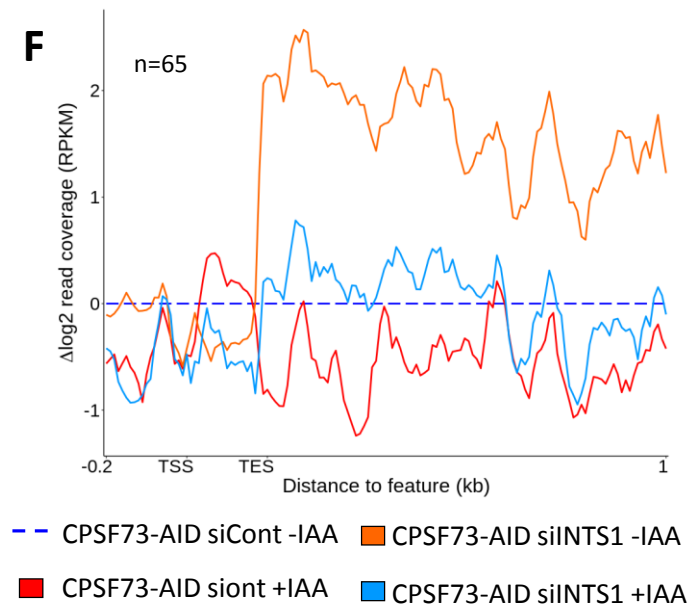**FIGURE S2**

**FIGURE S2. DIS3 and CPSF73 effects on snRNA processing and read-through RNA, Related to figures 2 and 3**

- A.** qRT-PCR analysis of snRNA precursor stability in *DIS3-AID* cells treated or not with auxin. Quantitation shows the proportion of precursor remaining after 15 mins triptolide treatment versus the respective untreated condition (t0). n=3, error bars are SEM.
- B.** Meta-analysis of nuclear RNA-seq data obtained in *DIS3-AID* cells treated or not with auxin (1 hr) to assay signal over all expressed snRNA genes (Davidson et al., 2019). Y-axis shows RPKM.
- C.** Metaplot of all expressed protein-coding genes separated from neighbouring genes by at least 10kb. The region downstream of the PAS (TES) is shown. This shows DIS3-PAR clip signal and reads obtained from our previously published RNA-seq performed in *DIS3-AID* cells treated or not with auxin (1 hr) (Davidson et al., 2019; Szczepinska et al., 2015). Y-axis scale is RPKM. It is clear that DIS3 does not occupy this region and its depletion does not affect read-through RNA levels.
- D.** Metaplot of snRNA genes generated from the Pol II ChIP-seq performed in *CPSF73-AID* cells treated or not with auxin (3hr). Y-axis scale is RPKM.
- E.** Metaplot of protein-coding genes that do not contain another gene within 20kb of their TES, generated from the Pol II ChIP-seq performed in *CPSF73-AID* cells treated or not with auxin (3hr). Signal was normalised to gene body levels in each case. Y-axis scale is RPKM. This shows that the negative result in B is not due to incomplete CPSF73 elimination or another experimental failure.
- F.**  $\Delta\log_2$  representation of the metagene present in main text Figure 3B. This demonstrates the reduced level of 3' flanking RNA in samples depleted of CPSF73 (red line). This likely contributes to the apparent reduced impact of INTS1 depletion in this scenario (light blue trace).

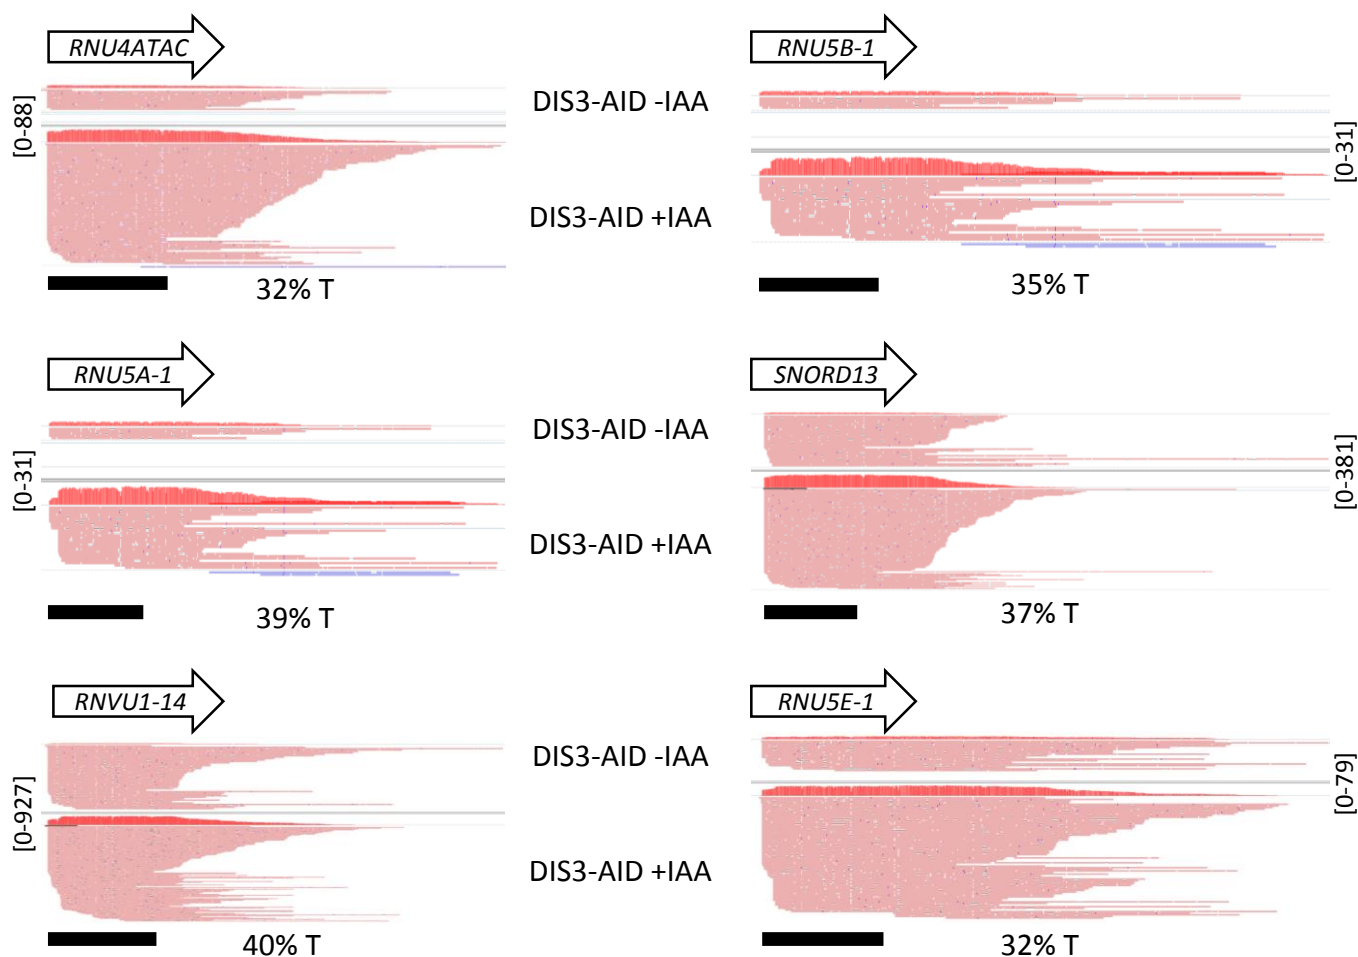

**FIGURE S3. Examples of snRNA nanopore sequence traces, Related to figure 4**

IGV tracks showing long-read coverage over a collection of sn/snoRNA genes (as labelled) in samples from *DIS3-AID* - cells treated or not with auxin (3hr) to complement those in Figure 4. In all cases, there are stochastic 3' ends that are stabilised by exosome loss. These do not always stack over specific regions though terminator regions have high T content (indicated). By contrast, the 5' ends of most reads map to the expected transcriptional start site regions. Note that some snRNAs show short truncations at their 5' ends. The possibility that these show 5' degradation intermediates cannot be distinguished from the possibility that they represent incomplete cDNA synthesis/5' degradation during RNA isolation. Y-axis scales are TPM. Genes are labelled and their precise position is indicated by the black bars which provide length scale. *RNU4ATAC*, 127bp; *RNU5B-1*, 116bp; *RNU5A-1*, 116bp; *SNORD13*, 104bp; *RNVU1-14*, 164bp; *RNU5E-1*, 120bp.

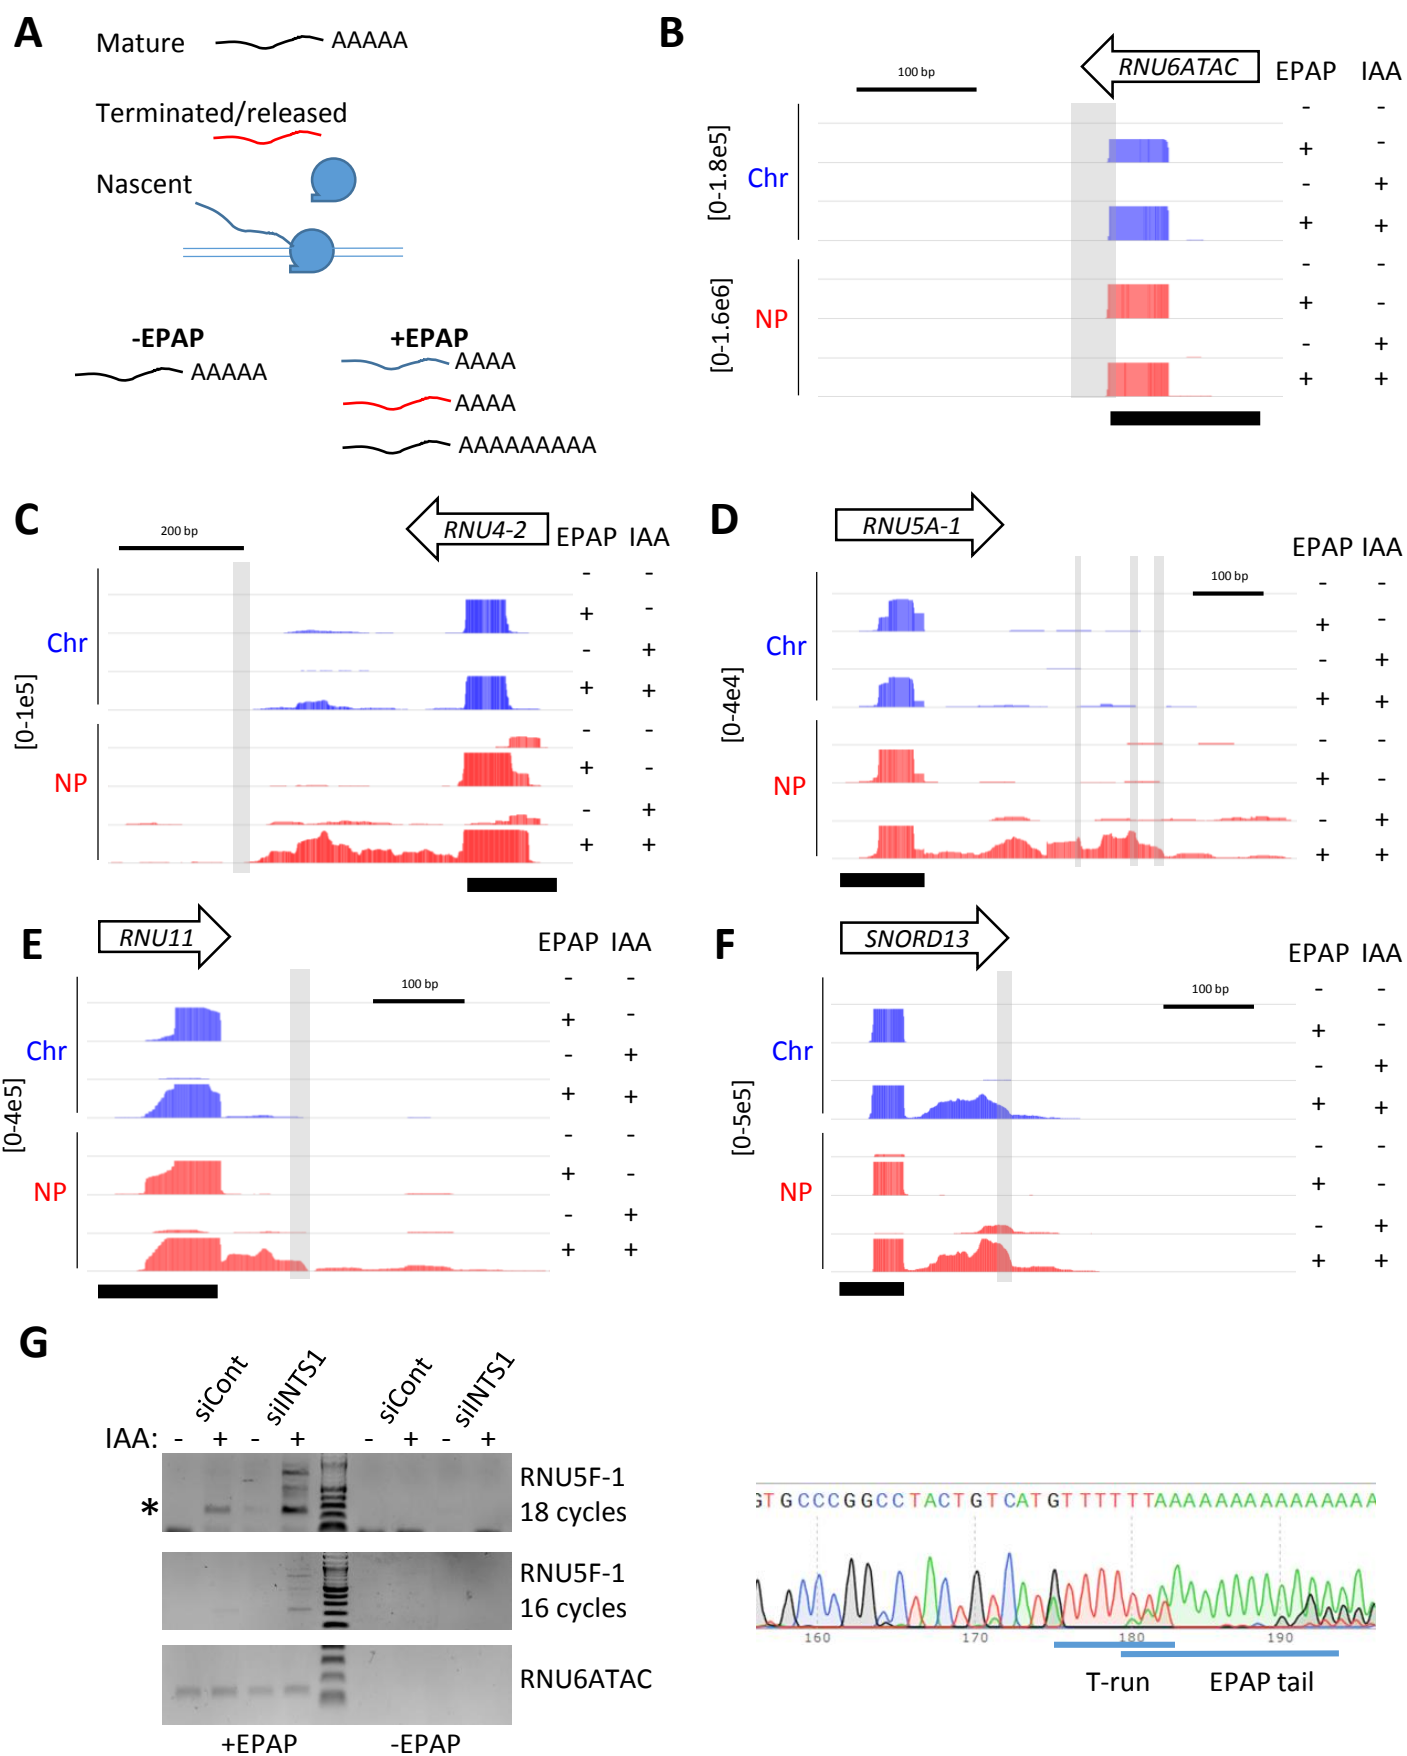

**FIGURE S4**

## FIGURE S4. Evidence of termination at T-runs obtained via in vitro polyadenylation and sequencing of 3' ends,

### Related to figure 4

**A.** Schematic of an orthogonal 3' end mapping method. Nuclear RNA is treated or not with *E.coli* poly(A) polymerase (EPAP) before 3' end mapping by oligodT primed RNA-seq. Without EPAP, only RNAs with an existing poly(A) tail (black) can be mapped. However, EPAP treatment detects transcripts that are not normally polyadenylated. These might include transcripts isolated from engaged Pol II (blue; chromatin-associated) or other transcripts released from chromatin (red; nucleoplasmic).

**B.** IGV track for the Pol III-transcribed U6 ATAC gene. Tracks show chromatin (blue) and nucleoplasmic (red) signals deriving from RNAs isolated from *DIS3-AID* cells treated or not with auxin (2hr). EPAP and auxin treatments are indicated beside the traces. U6 ATAC is not normally polyadenylated and is only detected in samples treated with EPAP demonstrating the capacity of this method to differentiate polyadenylated and non-polyadenylated 3' ends. Y-axis scale is RPKM. Gene is labelled and its position on the trace is noted by the black bars which provide length scale. *RNU6ATAC* is 126bp. The shaded region denotes the T-run terminator

**C-F.** Examples of sn and representative snoRNAs. Labelling is as per B. Transcripts are enriched by EPAP treatment and more abundant when auxin is used demonstrating their normally unadenylated status and susceptibility to DIS3. Signal is more abundant in nucleoplasmic RNA consistent with release of exosome substrates after termination of transcription. However, stabilised reads are also evident in the chromatin-associated fraction consistent with their production by termination (i.e. that they are nascent). We do not know whether there is any subsequent nuclear export/reimport of these species. Note that there is more enrichment of reads further into the 3' flank than for long-read sequencing. This is probably because PCR amplification of longer reads will generally be more biased in favour of shorter cDNAs compared to this short-read approach. Y-axis scale is RPKM. Genes are labelled and their precise position is indicated by the black bars which provide length scale. *RNU4-2*, 141bp; *RNU5A-1*, 115bp; *SNORD13*, 104bp, *RNU12*, 150bp. Shaded areas indicate T-runs.

**G.** Analysis of 3' terminated precursors from *RNU5F-1* recovered from *DIS3-AID* cells transfected with control or INTS1 siRNAs before treatment or not with auxin. Before PCR amplification, samples were treated or not with EPAP as indicated. Termination products are seen following depletion of DIS3 but are most enriched when DIS3 and INTS1 are co-depleted. The co-depletion reveals additional downstream termination products showing that upstream sites are not sufficient for complete termination. Signals are dependent on EPAP demonstrating that they are genuine 3' ends. Two panels are shown for *RNU5F-1* representing different cycle numbers. U6ATAC is a loading control and is detected via the EPAP polyadenylation of its 3' end which is known to be formed at a T-run. The sequencing trace of the asterisked PCR product is shown and confirms its termination at a T-run. Interestingly, the EPAP tail is not evident prior to the 4<sup>th</sup> T in the tract indicating that a minimum of 4 T's are required to release the RNA at this position.



| Ensembl ID      | Gene ID   | Ensembl ID      | Gene ID     |
|-----------------|-----------|-----------------|-------------|
| ENSG00000199347 | RNU5E-1   | ENSG00000212413 | RNU11-3P    |
| ENSG00000206652 | RNU1-1    | ENSG00000201616 | RNU1-91P    |
| ENSG00000207389 | RNU1-4    | ENSG00000221439 | RNU4ATAC16P |
| ENSG00000207005 | RNU1-2    | ENSG00000201435 | RNU4-24P    |
| ENSG00000201609 | RNU4-28P  | ENSG00000202538 | RNU4-2      |
| ENSG00000274978 | RNU11     | ENSG00000200795 | RNU4-1      |
| ENSG00000199377 | RNU5F-1   | ENSG00000202347 | RNU1-16P    |
| ENSG00000200169 | RNU5D-1   | ENSG00000206588 | RNU1-28P    |
| ENSG00000275538 | RNVU1-19  | ENSG00000199568 | RNU5A-1     |
| ENSG00000277610 | RNVU1-4   | ENSG00000200156 | RNU5B-1     |
| ENSG00000207349 | RNVU1-17  | ENSG00000252311 | RNU1-103P   |
| ENSG00000207205 | RNVU1-15  | ENSG00000200903 | RNU1-42P    |
| ENSG00000278099 | RNVU1-2A  | ENSG00000200997 | RNU1-85P    |
| ENSG00000277918 | RNVU1-28  | ENSG00000206687 | RNU1-109P   |
| ENSG00000207501 | RNVU1-14  | ENSG00000238735 | RNU7-113P   |
| ENSG00000270722 | RNVU1-31  | ENSG00000264229 | RNU4ATAC    |
| ENSG00000201558 | RNVU1-6   | ENSG00000201574 | RNU1-93P    |
| ENSG00000273768 | RNVU1-29  | ENSG00000238812 | RNU7-127P   |
| ENSG00000274428 | RNVU1-25  | ENSG00000276027 | RNU12       |
| ENSG00000286172 | RNVU1-8   | ENSG00000207322 | RNU1-89P    |
| ENSG00000206585 | RNVU1-7   | ENSG00000202215 | RNU1-51P    |
| ENSG00000199879 | RNVU1-22  | ENSG00000201910 | RNU1-140P   |
| ENSG00000202408 | RNVU1-21  | ENSG00000206624 | RNU1-39P    |
| ENSG00000207340 | RNVU1-1   | ENSG00000206702 | RNU1-11P    |
| ENSG00000252135 | RNU1-155P | ENSG00000200597 | RNU1-87P    |
| ENSG00000238825 | RNVU1-2   | ENSG00000206908 | RNU1-136P   |
| ENSG00000201183 | RNVU1-3   | ENSG00000251988 | RNU4ATAC18P |
| ENSG00000274210 | RNVU1-27  | ENSG00000199846 | RNU1-72P    |
| ENSG00000206828 | RNVU1-30  | ENSG00000207201 | RNU1-148P   |
| ENSG00000199672 | RNU4-21P  | ENSG00000200731 | RNU1-124P   |
| ENSG00000223156 | RNU2-18P  | ENSG00000207110 | RNU1-106P   |
| ENSG00000200176 | RNU1-19P  | ENSG00000251745 | RNU7-124P   |
| ENSG00000207175 | RNU1-67P  |                 |             |

**Table S1. List of snRNA genes used for metaplot analyses, Related to figures 1E, 1F, 2E, 3B, 3D, S1C, S2B, S2D and S2F.**

Those highlighted in pink denotes snRNAs with long reads terminating at 3' ends ending in 4<T following DIS3 depletion

Table S2. primer information

| Opening original vector to insert INTS11 homology arms | Sequence                                                                                                                                                                                                                                                                                                                                                                                                                                                                                                                                                                                                                                                                                                               |
|--------------------------------------------------------|------------------------------------------------------------------------------------------------------------------------------------------------------------------------------------------------------------------------------------------------------------------------------------------------------------------------------------------------------------------------------------------------------------------------------------------------------------------------------------------------------------------------------------------------------------------------------------------------------------------------------------------------------------------------------------------------------------------------|
| fw                                                     | AGTTGCGCAGCCTGAATGGCGA                                                                                                                                                                                                                                                                                                                                                                                                                                                                                                                                                                                                                                                                                                 |
| rv                                                     | TACCGAGCTCGAATTCTGAATC                                                                                                                                                                                                                                                                                                                                                                                                                                                                                                                                                                                                                                                                                                 |
| <b>INTS11 Homology Arms</b>                            | GATTACGAATTCTGAGCTCGGTAACCTCCCTGGGCCCTGGAGGCCA<br>GGCAGGGTCTCACCAGCCTCCCCACAGCGTCTGAAGGACCACT<br>GTGTGCAGCACCTCCAGACGGCTCTGTGACTGTGGAGTCCGTCC<br>TCCTCCAGGCCCGCCCTTCTGAGGACCCAGGCACCAAGGTGC<br>TGCTGGTCTCCTGGACCTACCAGGTAAGGGGTGACCCCCACCCCA<br>CCGCGGTCAACACAGGTATCAACATTCTCCCTGTCTGCACCCACC<br>CAACATGCTTTTGCCTCTGCCCTAGGACGAGGAGCTGGGGAGCTT<br>CCTCACATCTCTGCTGAAGAAGGGCCTCCCCAGGCCCCAGCTGA<br>GGCCGGCAACTCACCCAGCCGCCACTCTGCCCTCTCCCAGCTGG<br>ACAGACCCTGGGCCTGCACTTCAGGACTGTGGTGCCTGGTGA<br>ACAGACCCTGCAGTCCCATCCCTGGGGACAGAGCCCTTGTGTCA<br>CCTGCCTGCCAGGAGCTGTTGACAGTGAAGAAACAACTGGTC<br>TCCAGGCTGTCTTGCCTTATCTGGTTAGGGCAGGTGGTCTCA<br>GACAGCAGTTTCCAGTAAAAGCTGAACAAAAGACTACTTGGTACTCT<br>CAGTTGCGCAGCCTGAATGGCGA |
| <b>Opening up INTS11 homology vector</b>               |                                                                                                                                                                                                                                                                                                                                                                                                                                                                                                                                                                                                                                                                                                                        |
| INTS11-vec fw                                          | CTCTGCCCTCTCCCAGCTGGA                                                                                                                                                                                                                                                                                                                                                                                                                                                                                                                                                                                                                                                                                                  |
| INTS11-vec rv                                          | GCTGGGGGCCTGGGGGAGGC                                                                                                                                                                                                                                                                                                                                                                                                                                                                                                                                                                                                                                                                                                   |
| <b>INTS11 SMASH amplification</b>                      |                                                                                                                                                                                                                                                                                                                                                                                                                                                                                                                                                                                                                                                                                                                        |
| INTS11 PCR fw                                          | CCCAGGCCCCAGCGATGAGATGGAAGAGTGCTCT                                                                                                                                                                                                                                                                                                                                                                                                                                                                                                                                                                                                                                                                                     |
| INTS11 PCR rv                                          | CTGCAGGATTTCCAGGGAGTAGAGAACCCTCCCTGTCAGGTA                                                                                                                                                                                                                                                                                                                                                                                                                                                                                                                                                                                                                                                                             |
| <b>INTS11 guide (gRNA) primers</b>                     |                                                                                                                                                                                                                                                                                                                                                                                                                                                                                                                                                                                                                                                                                                                        |
| INTS11 gRNA fw                                         | CACCGAGAGGGCAGAGGTGGCGGT                                                                                                                                                                                                                                                                                                                                                                                                                                                                                                                                                                                                                                                                                               |
| INTS11 gRNA rv                                         | AAACAGCCGCCACCTCTGCCCTCTC                                                                                                                                                                                                                                                                                                                                                                                                                                                                                                                                                                                                                                                                                              |
| <b>RNU4-2 Cloning</b>                                  |                                                                                                                                                                                                                                                                                                                                                                                                                                                                                                                                                                                                                                                                                                                        |
| Host plasmid F                                         | AAGGGAATGTGGGAGGTCAG                                                                                                                                                                                                                                                                                                                                                                                                                                                                                                                                                                                                                                                                                                   |
| Host plasmid R                                         | GTCAACCGGTATATCTGGCC                                                                                                                                                                                                                                                                                                                                                                                                                                                                                                                                                                                                                                                                                                   |
| RNU4-2 Insert F                                        | GCATAAGATTCCCAGCGTC                                                                                                                                                                                                                                                                                                                                                                                                                                                                                                                                                                                                                                                                                                    |
| RNU4-2 Insert R                                        | GGAACAGCGAAAACCTCCGT                                                                                                                                                                                                                                                                                                                                                                                                                                                                                                                                                                                                                                                                                                   |
| Delta T-run F                                          | AAGGGAATGTGGGAGGTCAG                                                                                                                                                                                                                                                                                                                                                                                                                                                                                                                                                                                                                                                                                                   |
| Delta T-run R                                          | CTTTGGATGTATTAATGTGTTAGTTTTAG                                                                                                                                                                                                                                                                                                                                                                                                                                                                                                                                                                                                                                                                                          |
| RNU4-2 plasmid read-through F                          | AAGGGAATGTGGGAGGTCAG                                                                                                                                                                                                                                                                                                                                                                                                                                                                                                                                                                                                                                                                                                   |
| RNU4-2 plasmid read-through R                          | GTTTGCAGCCTCACCTTCTT                                                                                                                                                                                                                                                                                                                                                                                                                                                                                                                                                                                                                                                                                                   |
| <b>qPCR primers</b>                                    |                                                                                                                                                                                                                                                                                                                                                                                                                                                                                                                                                                                                                                                                                                                        |
| ACTB fw                                                | CATCCGCAAGACCTGTACG                                                                                                                                                                                                                                                                                                                                                                                                                                                                                                                                                                                                                                                                                                    |
| ACTB rv                                                | CCTGCTTGCTGATCCACATC                                                                                                                                                                                                                                                                                                                                                                                                                                                                                                                                                                                                                                                                                                   |
| INTS1 fw                                               | CCTCATGTACCTGCCAAGA                                                                                                                                                                                                                                                                                                                                                                                                                                                                                                                                                                                                                                                                                                    |
| INTS1 rv                                               | CATGAGGAGGTTACAGGCCA                                                                                                                                                                                                                                                                                                                                                                                                                                                                                                                                                                                                                                                                                                   |
| RNU4-1 UC fw                                           | CCAATACCCCGCCGTGAC                                                                                                                                                                                                                                                                                                                                                                                                                                                                                                                                                                                                                                                                                                     |
| RNU4-1 UC rv                                           | TGCCAACAAAGTACTCTTCAACC                                                                                                                                                                                                                                                                                                                                                                                                                                                                                                                                                                                                                                                                                                |
| RNU5A-1 UC fw                                          | CTGGTTTCTCTTCAGATCGCA                                                                                                                                                                                                                                                                                                                                                                                                                                                                                                                                                                                                                                                                                                  |
| RNU5A-1 UC rv                                          | CAGAATCTGCTAGTCACTGCT                                                                                                                                                                                                                                                                                                                                                                                                                                                                                                                                                                                                                                                                                                  |
| RNU4-2 500bp fw                                        | ACACTATGTTGGAACTGGGT                                                                                                                                                                                                                                                                                                                                                                                                                                                                                                                                                                                                                                                                                                   |
| RNU4-2 500bp rv                                        | GGAACAGCGAAAACCTCCGT                                                                                                                                                                                                                                                                                                                                                                                                                                                                                                                                                                                                                                                                                                   |
| RNU4-2 1kb fw                                          | CACTACACCAGCCTCTTCCA                                                                                                                                                                                                                                                                                                                                                                                                                                                                                                                                                                                                                                                                                                   |
| RNU4-2 1kb rv                                          | TTTTCCCAAGCACCCTTTTG                                                                                                                                                                                                                                                                                                                                                                                                                                                                                                                                                                                                                                                                                                   |
| RNU4-2 2kb fw                                          | ACTGCAATCTCCACTTCCCA                                                                                                                                                                                                                                                                                                                                                                                                                                                                                                                                                                                                                                                                                                   |
| RNU4-2 2kb rv                                          | TGAGCCCAGGAGTTTGAGAC                                                                                                                                                                                                                                                                                                                                                                                                                                                                                                                                                                                                                                                                                                   |
| RNU4-2 3kb fw                                          | TATTGGTCAGGCTGGTCTCG                                                                                                                                                                                                                                                                                                                                                                                                                                                                                                                                                                                                                                                                                                   |
| RNU4-2 3kb rv                                          | AACCTTCTCCAGCTGTCTCTC                                                                                                                                                                                                                                                                                                                                                                                                                                                                                                                                                                                                                                                                                                  |
| RNU1-1 500bp fw                                        | TCTCTGGGAAGAAAGCAGGG                                                                                                                                                                                                                                                                                                                                                                                                                                                                                                                                                                                                                                                                                                   |
| RNU1-1 500bp rv                                        | ACGGCAGGAGATAGTAGGGA                                                                                                                                                                                                                                                                                                                                                                                                                                                                                                                                                                                                                                                                                                   |
| RNU1-1 1kb fw                                          | GGTTTTGTCCCTGCACTACA                                                                                                                                                                                                                                                                                                                                                                                                                                                                                                                                                                                                                                                                                                   |
| RNU1-1 1kb rv                                          | AGGCTGGTCTTGAACCTCTG                                                                                                                                                                                                                                                                                                                                                                                                                                                                                                                                                                                                                                                                                                   |
| RNU1-1 2kb fw                                          | TCTCTGTTGGGTCGTGTTGA                                                                                                                                                                                                                                                                                                                                                                                                                                                                                                                                                                                                                                                                                                   |
| RNU1-1 2kb rv                                          | GCCACTCTTGACAGATTTGACA                                                                                                                                                                                                                                                                                                                                                                                                                                                                                                                                                                                                                                                                                                 |
| RNU5B-1 300bp fw                                       | CCGGTAATCCCCTGCAATTTG                                                                                                                                                                                                                                                                                                                                                                                                                                                                                                                                                                                                                                                                                                  |
| RNU5B-1 300bp rv                                       | CATTGTCCATGTGTGCCGAT                                                                                                                                                                                                                                                                                                                                                                                                                                                                                                                                                                                                                                                                                                   |
| RNU5B-1 1.5kb fw                                       | AGAATCGCTTGAACTGGGA                                                                                                                                                                                                                                                                                                                                                                                                                                                                                                                                                                                                                                                                                                    |
| RNU5B-1 1.5kb rv                                       | CCAGCCTGTGTGATAAAGCC                                                                                                                                                                                                                                                                                                                                                                                                                                                                                                                                                                                                                                                                                                   |
| RNU5D-1 200bp fw                                       | TGTTTGTGCGAGGTGTGAG                                                                                                                                                                                                                                                                                                                                                                                                                                                                                                                                                                                                                                                                                                    |
| RNU5D-1 200bp rv                                       | GGAAAATCCCTTGAGCCGG                                                                                                                                                                                                                                                                                                                                                                                                                                                                                                                                                                                                                                                                                                    |
| RNU5D-1 3.5kb fw                                       | TAGCTGAATGTGGTCTGTGGT                                                                                                                                                                                                                                                                                                                                                                                                                                                                                                                                                                                                                                                                                                  |
| RNU5D-1 3.5kb rv                                       | TCCTGACCTCATGATCTGCC                                                                                                                                                                                                                                                                                                                                                                                                                                                                                                                                                                                                                                                                                                   |
| RNU1-28P 300bp fw                                      | GTGCTTTCTCCAGGCCAAAG                                                                                                                                                                                                                                                                                                                                                                                                                                                                                                                                                                                                                                                                                                   |
| RNU1-28P 300bp rv                                      | GGACCAGGATTAATTGCCCG                                                                                                                                                                                                                                                                                                                                                                                                                                                                                                                                                                                                                                                                                                   |
| RNU1-28P 2.5kb fw                                      | TTTACCCTGTGCATCCAGGA                                                                                                                                                                                                                                                                                                                                                                                                                                                                                                                                                                                                                                                                                                   |
| RNU1-28P 2.5kb rv                                      | GGGTGACAGCGAGACTTAGT                                                                                                                                                                                                                                                                                                                                                                                                                                                                                                                                                                                                                                                                                                   |
| <b>siRNAs</b>                                          |                                                                                                                                                                                                                                                                                                                                                                                                                                                                                                                                                                                                                                                                                                                        |
| INTS1                                                  | Thermo fisher silencer select # s25211                                                                                                                                                                                                                                                                                                                                                                                                                                                                                                                                                                                                                                                                                 |
| EXOSC3                                                 | Thermo fisher silencer select # s27231                                                                                                                                                                                                                                                                                                                                                                                                                                                                                                                                                                                                                                                                                 |
| CONTROL                                                | Thermo fisher ON TARGET control #2                                                                                                                                                                                                                                                                                                                                                                                                                                                                                                                                                                                                                                                                                     |
| <b>Long-read/EPAP reverse primers</b>                  |                                                                                                                                                                                                                                                                                                                                                                                                                                                                                                                                                                                                                                                                                                                        |
| Nanopore reverse primer                                | ACTTGCCTGTCGCTCTATCTTCCCCCCCCCTTT                                                                                                                                                                                                                                                                                                                                                                                                                                                                                                                                                                                                                                                                                      |
| EPAP reverse primer (Figure 4H)                        | ACTTGCCTGTCGCTCTATCTTTTTTTTTTTTTTAAA                                                                                                                                                                                                                                                                                                                                                                                                                                                                                                                                                                                                                                                                                   |
| <b>RNU5F-1 analysis (supplemental Figure 4G)</b>       |                                                                                                                                                                                                                                                                                                                                                                                                                                                                                                                                                                                                                                                                                                                        |
| RT primer                                              | ACTTGCCTGTCGCTCTATCTTTTTTTTTTTTTTAAA                                                                                                                                                                                                                                                                                                                                                                                                                                                                                                                                                                                                                                                                                   |
| RNU5F-1 fw OUT                                         | GGCTGAATGTTCTGTTACTAAAGAG                                                                                                                                                                                                                                                                                                                                                                                                                                                                                                                                                                                                                                                                                              |
| RNU5F-1 fw IN                                          | ACTAAAGAGAGACGCTGGGTG                                                                                                                                                                                                                                                                                                                                                                                                                                                                                                                                                                                                                                                                                                  |
| PCR rv                                                 | ACTTGCCTGTCGCTCTATCTT                                                                                                                                                                                                                                                                                                                                                                                                                                                                                                                                                                                                                                                                                                  |

Table S2. Sequences of synthesised DNAs for INTS11 cell line generation, oligonucleotides for qRT-PCR and siRNAs new to this study, Related to STAR Methods
